# Supplementary material for: Protective Effects of Emodin on Oxidized Fish Oil-Induced Metabolic Disorder and Oxidative Stress through Notch-Nrf2 Crosstalk in the Liver of Teleost Megalobrama amblycephala
Source: MDPI journal article supplement (doi:10.3390/antiox11061179), 2022-06-15
Supplement: s1 [file s1]

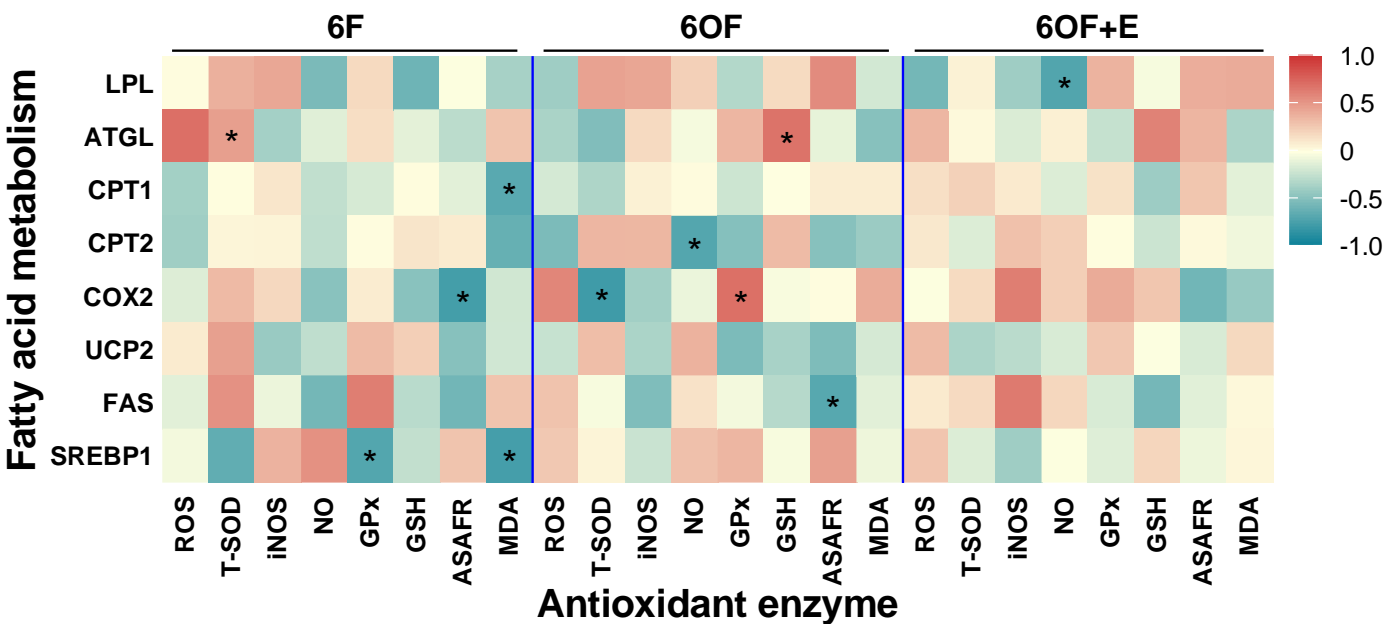

**Figure S1. Interaction analysis between fatty acid metabolism and antioxidant capacity**  
 Correlation analysis between fatty acid metabolism and antioxidant enzyme related parameters were retrieved from Pearson analysis. Data were analyzed by Students' *t*-test; \* represents  $p < 0.05$ , and \*\* represents  $p < 0.01$ ; results were indicated as mean  $\pm$  SEM, n=9.

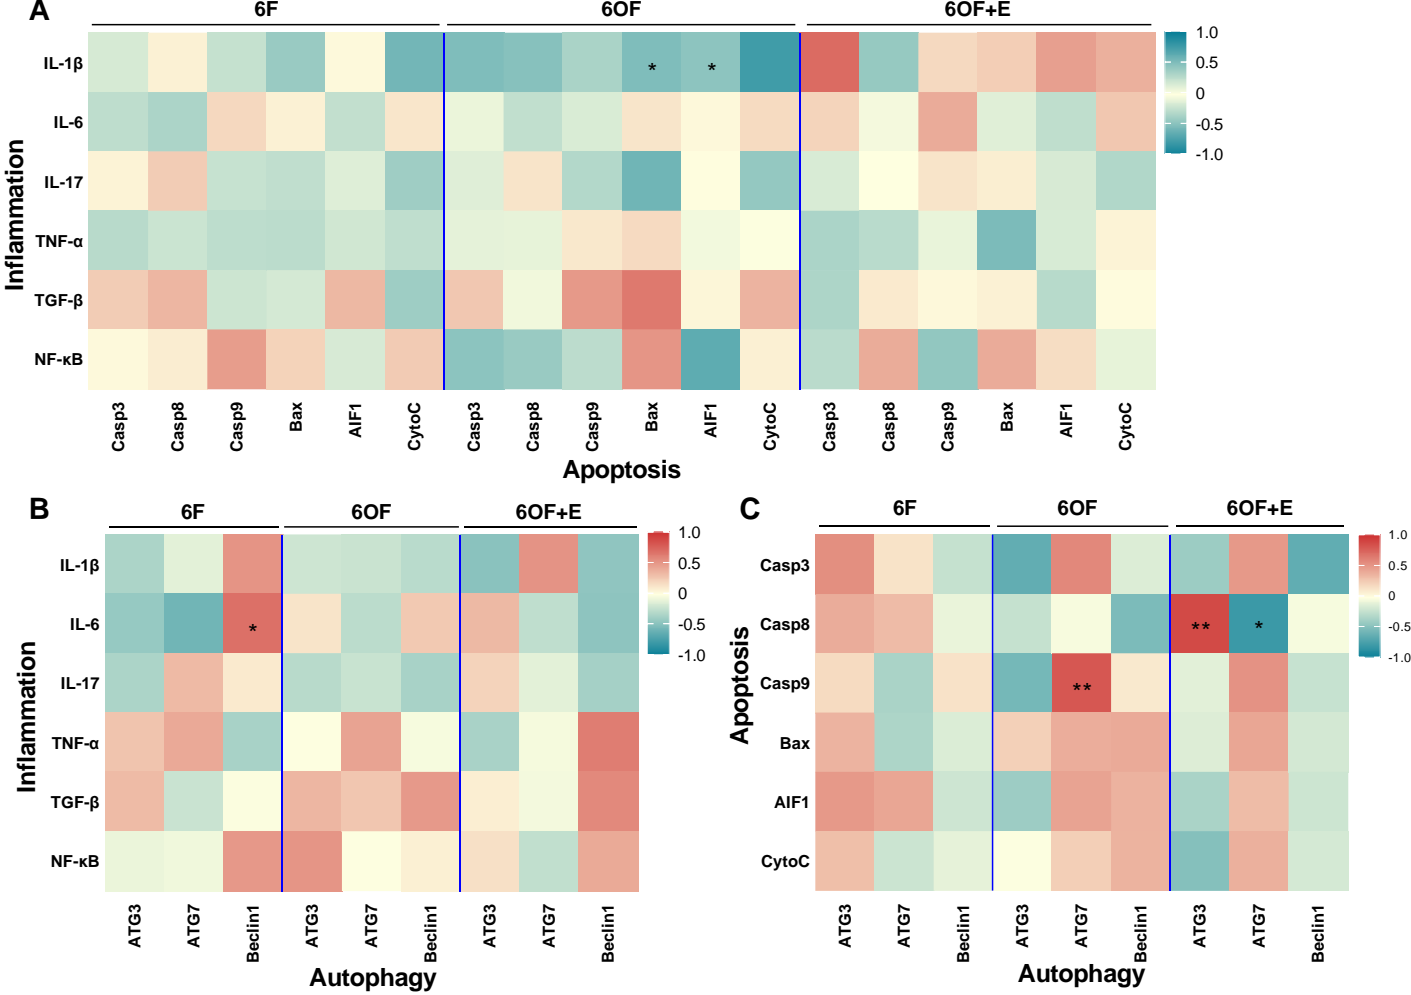

**Figure S2. Interaction analysis among inflammation, apoptosis, and autophagy**  
Correlation analysis was retrieved from Pearson analysis. A) correlation between inflammation and apoptosis related key genes; B) correlation between inflammation and autophagy; C) correlation between apoptosis and autophagy. Data were analyzed by Students' *t*-test; \* represents  $p < 0.05$ , and \*\* represents  $p < 0.01$ ; results were indicated as mean  $\pm$  SEM,  $n=9$ .
